# Supplementary material for: Gut Ruminococcaceae levels at baseline correlate with risk of antibiotic-associated diarrhea
Source: PubMed Central journal article supplement (PMC8718891; doi:10.1016/j.isci.2021.103644), 2021-12-16
Supplement: mmc1.pdf [file mmc1.pdf]

**Supplemental information**

**Gut Ruminococcaceae levels  
at baseline correlate with risk  
of antibiotic-associated diarrhea**

**Xiaoqiong Gu, Jean X.Y. Sim, Wei Lin Lee, Liang Cui, Yvonne F.Z. Chan, Ega Danu Chang, Yii Ean Teh, An-Ni Zhang, Federica Armas, Franciscus Chandra, Hongjie Chen, Shijie Zhao, Zhanyi Lee, Janelle R. Thompson, Eng Eong Ooi, Jenny G. Low, Eric J. Alm, and Shirin Kalimuddin**

1 **Table S1. Demographic Characteristics of Healthy Volunteers.** Related to Figure 1-3. Subject 18,  
 2 28, and 32 did not meet the requirements to participate in the study during screening and were not  
 3 dosed with antibiotics. Individuals with AAD are highlighted in yellow.

| ID | Age | Sex    | Ethnicity  | Height (m) | Weight (kg) | BMI <sup>a</sup> | Total doses of Amoxicillin-Clavulanate |
|----|-----|--------|------------|------------|-------------|------------------|----------------------------------------|
| 1  | 39  | Female | Chinese    | 1.61       | 68          | 26.4             | 6                                      |
| 2  | 26  | Male   | Malay      | 1.68       | 71          | 25.0             | 4 <sup>c</sup>                         |
| 3  | 34  | Female | Chinese    | 1.61       | 58          | 22.2             | 6                                      |
| 4  | 38  | Male   | Chinese    | 1.79       | 68          | 21.1             | 6                                      |
| 5  | 28  | Male   | Chinese    | 1.77       | 96          | 30.5             | 6                                      |
| 6  | 37  | Male   | Chinese    | 1.77       | 82          | 26.1             | 6                                      |
| 7  | 40  | Female | Chinese    | 1.71       | 73          | 24.9             | 6                                      |
| 8  | 29  | Female | Chinese    | 1.63       | 69          | 25.8             | 6                                      |
| 9  | 24  | Female | Chinese    | 1.62       | 52          | 20.0             | 6                                      |
| 10 | 25  | Male   | Chinese    | 1.67       | 67          | 24.1             | 6                                      |
| 11 | 23  | Female | Chinese    | 1.65       | 52          | 19.1             | 6                                      |
| 12 | 28  | Female | Chinese    | 1.56       | 58          | 23.8             | 6                                      |
| 13 | 31  | Female | Chinese    | 1.65       | 64          | 23.4             | 6                                      |
| 14 | 38  | Female | Chinese    | 1.58       | 61          | 24.4             | 6                                      |
| 15 | 23  | Female | Chinese    | 1.63       | 48          | 18.1             | 1 <sup>c</sup>                         |
| 16 | 29  | Male   | Chinese    | 1.6        | 74          | 28.9             | 5 <sup>c</sup>                         |
| 17 | 40  | Female | Chinese    | 1.59       | 74          | 29.4             | 6                                      |
| 19 | 25  | Male   | Chinese    | 1.8        | 88          | 27.2             | 6                                      |
| 20 | 40  | Female | Chinese    | 1.58       | 57          | 22.7             | 6                                      |
| 21 | 34  | Male   | Malay      | 1.69       | 68          | 23.9             | 6                                      |
| 22 | 25  | Female | Chinese    | 1.60       | 74          | 28.9             | 6                                      |
| 23 | 32  | Male   | Chinese    | 1.78       | 108         | 34.1             | 6                                      |
| 24 | 30  | Male   | Chinese    | 1.71       | 73          | 24.8             | 3 <sup>c</sup>                         |
| 25 | 23  | Male   | Chinese    | 1.53       | 50          | 21.7             | 1 <sup>b</sup>                         |
| 26 | 24  | Male   | Chinese    | 1.75       | 77          | 25.0             | 6                                      |
| 27 | 23  | Male   | Chinese    | 1.72       | 69          | 23.3             | 6                                      |
| 29 | 24  | Male   | Chinese    | 1.77       | 70          | 22.4             | 6                                      |
| 30 | 40  | Male   | Chinese    | 1.76       | 78          | 25.3             | 6                                      |
| 31 | 30  | Female | Indian     | 1.64       | 73          | 27.1             | 6                                      |
| 33 | 27  | Female | Vietnamese | 1.51       | 52          | 22.9             | 6                                      |

4  
 5 <sup>b</sup>Subject 25 developed severe vomiting after a single dose of amoxicillin-clavulanate, resulting in  
 6 discontinuation of antibiotics on day 1.

7 <sup>c</sup>Subject 2, 15, 16 and 24 experienced 3 or more episodes of watery stool in a 24-hour period (Table  
 8 S2), resulting in discontinuation of antibiotics.

10 **Table S2. Demographic Characteristics of Individuals in the AAD And Non-AAD Groups.** Related  
 11 to Figure 1. Two-tailed Mann-Whitney tests were performed to test for significant differences between  
 12 the AAD and non-AAD groups.

|        | AAD individuals (n=13) | non-AAD individuals (n=17) | p value |
|--------|------------------------|----------------------------|---------|
| Sex    | --                     | --                         | 0.46    |
| Female | 5(38%)                 | 10(59%)                    |         |
| Male   | 8(62%)                 | 7(41%)                     |         |
| Age    | 30(26-37)              | 28(24-34)                  | 0.34    |
| BMI    | 24.86(23.91-26.40)     | 23.75(22.19-25.84)         | 0.39    |
| Height | 1.68(1.63-1.71)        | 1.63(1.59-1.75)            | 0.31    |
| Weight | 70.65(67.10-74.00)     | 68.65(57.8-73.95)          | 0.46    |

Data are n/N (%) for proportional data and median (IQR) for continuous data, unless specified otherwise.

13

**Table S3. Frequency and Bristol Stool Scale type.** Related to Figure 1-3. Faeces sample collection log book from 20 Aug 2019 to 20 Jan 2020. Subject 18, 28 and 32 failed during screening and were not dosed with antibiotics. Individuals with AAD are highlighted in yellow. Gray shaded boxes indicate that donors could not produce the stool samples or the stool samples were not collected. A total of 197 faeces samples were collected. BS - Bristol Stool Score; Freq – Frequency.

| ID | Screening |      | Day 0 |      | Day 1 |                | Day 2 |                | Day 3 |                | Day 7 |      | Day 14 |      | Day 28 |      |
|----|-----------|------|-------|------|-------|----------------|-------|----------------|-------|----------------|-------|------|--------|------|--------|------|
|    | BS        | Freq | BS    | Freq | BS    | Freq           | BS    | Freq           | BS    | Freq           | BS    | Freq | BS     | Freq | BS     | Freq |
| 1  | 4         | 2    | 4     | 2    | 5     | 3              | 6     | 2              | 6     | 2              | 4     | 2    | 4      | 1    | 4      | 2    |
| 2  | 3         | 3    | 3     | 3    | 3     | 4              | 5     | 5 <sup>a</sup> | 7     | 8              | NA    | NA   | 3      | 4    | 4      | 3    |
| 3  | 4         | 1    | 4     | 1    | 4     | 1              | 4     | 1              | 4     | 2              | 4     | 2    | 4      | 1    | 4      | 2    |
| 4  | 3         | 1    | 3     | 1    | 3     | 1              | 3     | 1              | 4     | 1              | 3     | 1    | 4      | 1    | NA     | 0    |
| 5  | 5         | 1    | 5     | 3    | 7     | 2              | 5     | 1              | 6     | 2              | 4     | 1    | 4      | 1    | 4      | 3    |
| 6  | 4         | 2    | 5     | 2    | 6     | 2              | 6     | 1              | 6     | 1              | 4     | 1    | 4      | 1    | 1      | 1    |
| 7  | 4         | 1    | 4     | 1    | 6     | 2              | 6     | 2              | 5     | 1              | 4     | 1    | 4      | 2    | 2      | 1    |
| 8  | 4         | 2    | 4     | 1    | 5     | 1              | 5     | 1              | 5     | 1              | 4     | 1    | 3      | 2    | 4      | 2    |
| 9  | 4         | 1    | 4     | 1    | 4     | 1              | 5     | 1              | 5     | 2              | 4     | 1    | 3      | 1    | 4      | 2    |
| 10 | 4         | 2    | 4     | 1    | 4     | 1              | 4     | 1              | 7     | 4              | NA    | NA   | NA     | NA   | 4      | 4    |
| 11 | 3         | 1    | 4     | 1    | 4     | 1              | 4     | 2              | 4     | 1              | 2     | 1    | 3      | 1    | 4      | 1    |
| 12 | 4         | 1    | 4     | 1    | NA    | NA             | NA    | NA             | 4     | 1              | 4     | 1    | 4      | 1    | 4      | 1    |
| 13 | 5         | 1    | 6     | 1    | 6     | 1              | 5     | 1              | 4     | 2              | 6     | 2    | 4      | 1    | 6      | 2    |
| 14 | 3         | 1    | 4     | 1    | 4     | 1              | 4     | 2              | 4     | 1              | 4     | 2    | 4      | 2    | 3      | 1    |
| 15 | 3         | 1    | 3     | 1    | 7     | 3 <sup>b</sup> | 6     | 3              | 4     | 1              | 5     | 1    | 4      | 2    | 3      | 1    |
| 16 | 4         | 1    | 6     | 1    | 6     | 1              | 6     | 2              | 7     | 5 <sup>c</sup> | 6     | 1    | 6      | 2    | 6      | 1    |
| 17 | 4         | 1    | 4     | 2    | 4     | 1              | 4     | 1              | 4     | 1              | 4     | 1    | 4      | 1    | 4      | 1    |
| 19 | 6         | 1    | 3     | 2    | 7     | 2              | 2     | 1              | 3     | 1              | 2     | 1    | 4      | 1    | 3      | 1    |
| 20 | 3         | 1    | 4     | 1    | 6     | 1              | 6     | 1              | 3     | 1              | 3     | 1    | 3      | 1    | 4      | 2    |
| 21 | 2         | 1    | 4     | 1    | 4     | 2              | 6     | 1              | 3     | 1              | 4     | 1    | 3      | 2    | 6      | 1    |
| 22 | 5         | 1    | 6     | 1    | 4     | 1              | 4     | 1              | 4     | 1              | 4     | 1    | 4      | 1    | 4      | 2    |
| 23 | 4         | 1    | 3     | 2    | 4     | 1              | 4     | 1              | 4     | 1              | 4     | 2    | 4      | 1    | 4      | 2    |
| 24 | 5         | 2    | 5     | 1    | 7     | 3 <sup>d</sup> | 4     | 2              | 1     | 2              | 4     | 2    | 4      | 1    | 4      | 2    |
| 25 | 3         | 1    | 3     | 1    | 4     | 1              | 5     | 1              | 4     | 1              | 5     | 1    | 4      | 1    | 4      | 1    |
| 26 | 4         | 1    | 3     | 2    | 3     | 1              | 4     | 2              | 4     | 2              | 4     | 2    | 4      | 2    | 4      | 2    |
| 27 | 4         | 1    | 4     | 2    | 5     | 1              | 5     | 3              | 5     | 1              | 4     | 1    | 4      | 2    | 4      | 1    |
| 29 | 4         | 1    | 4     | 2    | 4     | 2              | 4     | 3              | 4     | 2              | 5     | 2    | 4      | 2    | 4      | 3    |
| 30 | 4         | 1    | 4     | 2    | 2     | 1              | 2     | 2              | 2     | 1              | 5     | 4    | 4      | 1    | 4      | 1    |
| 31 | 4         | 3    | 4     | 4    | 4     | 2              | 4     | 2              | 4     | 2              | 4     | 2    | 5      | 1    | 4      | 2    |
| 33 | 2         | 1    | 1     | 2    | 2     | 1              | 3     | 1              | 2     | 1              | 1     | 1    | NA     | NA   | NA     | NA   |

<sup>a</sup>Subject 2 experienced 5 episodes of watery stool in a 24-hour period, resulting in discontinuation of antibiotics on day 2, with the total doses of amoxicillin-clavulanate as 4.

<sup>b</sup>Subject 15 experienced 3 episodes of watery stool in a 24-hour period, resulting in discontinuation of antibiotics on day 1, with the total doses of amoxicillin-clavulanate as 1.

<sup>c</sup>Subject 16 experienced 5 episodes of watery stool in a 24-hour period, resulting in discontinuation of antibiotics on day 3, with the total doses of amoxicillin-clavulanate as 5.

<sup>d</sup>Subject 24 experienced 3 episodes of watery stool in a 24-hour period, resulting in discontinuation of antibiotics on day 1, with the total doses of amoxicillin-clavulanate as 3.

**Table S4. Primer-probe sets used in this study.** Related to Figures 2-4.

| Name               | Sequences                                    | References            |
|--------------------|----------------------------------------------|-----------------------|
| 16S_V4_515F primer | GTGCCAGCMGCCGCGGTAA                          | Caporaso et al., 2011 |
| 16S_V4_806R primer | GGACTACHVGGGTWTCTAAT                         |                       |
| F. prau_FP         | GATGGCCTCGCGTCCGATTAG                        | Carroll et al, 2012   |
| F. prau_RP         | CCGAAGACCTTCTTCCTCC                          |                       |
| 16S_FP             | ACTCCTACGGGAGGCAGCAG                         | Van Hul et al, 2020   |
| 16S_RP             | ATTACCGCGGCTGCTGG                            |                       |
| TcdA_FP            | CAGTCGGATTGCAAGTAATTGACAAT                   | Kubota et al, 2014    |
| TcdA_RP            | AGTAGTATCTACTACCATTAACAGTCTGC                |                       |
| TcdA_Probe         | /56-FAM/TTGAGATGATAGCAGTGTCAGGATTG/36-TAMSp/ |                       |
| TcdB_FP            | TACAAACAGGTGTATTTAGTACAGAAGATGGA             |                       |
| TcdB_RP            | CACCTATTTGATTTAGMCCTTTAAAAGC                 |                       |
| TcdB_Probe         | /56-FAM/TTTKCCAGTAAAATCAATTGCTTC/36-TAMSp/   |                       |

**Table S5. gBlocks Gene Fragments sequences for *Faecalibacterium prausnitzii*, 16S rRNA, *C. difficile* TcdA and TcdB gene. Related to Figure 4.**

| gBlocks Gene Fragments                                                                       | Sequences                                                                                                                                                                                                                                                                                                                                                                                                                                                                              |
|----------------------------------------------------------------------------------------------|----------------------------------------------------------------------------------------------------------------------------------------------------------------------------------------------------------------------------------------------------------------------------------------------------------------------------------------------------------------------------------------------------------------------------------------------------------------------------------------|
| gBlocks Gene Fragments for <i>Faecalibacterium prausnitzii</i> and 16S rRNA positive control | GGTAGAGGGAAAAGGAGCAATCCGCTTTGAGATGGCCTCGCGTCCGAT<br>TAGCTAGTTGGTGAGGTAATGGCCACCAAGGCGACGATCGGTAGCCG<br>GACTGAGAGGTTGAACGGCCACATTGGGACTGAGACACGGCCAGACT<br>CCTACGGGAGGCAGCAGTGGGGAATATTGCACAATGGGGGAAACCT<br>GATGCAGCGACGCCGCGTGGAGGAAGAAGGTCTTCGGATTGTAACTC<br>CTGTTGTTGAGGAAGATAATGACGGTACTCAACAAGGAAGTGACGGCTA<br>ACTACGTGCCAGCAGCCGCGGTAATACGTAGGTCACAAGCGTTGTCCG<br>GAATTAC                                                                                                        |
| gBlocks Gene Fragments for <i>C. difficile</i> TcdA positive control                         | GGTAGAGGGAAAAGGAGCAATCCGCTTTGAGATGGCCTCGCGTCCGAT<br>TAGCTAGTTGGTGAGGTAATGGCCACCAAGGCGACGATCGGTAGCCG<br>GACTGAGAGGTTGAACGGCCACATTGGGACTGAGACACGGCCAGACT<br>CCTACGGGAGGCAGCAGTGGGGAATATTGCACAATGGGGGAAACCT<br>GATGCAGCGACGCCGCGTGGAGGAAGAAGGTCTTCGGATTGTAACTC<br>CTGTTGTTGAGGAAGATAATGACGGTACTCAACAAGGAAGTGACGGCTA<br>ACTACGTGCCAGCAGCCGCGGTAATACGTAGGTCACAAGCGTTGTCCG<br>GAATTAC                                                                                                        |
| gBlocks Gene Fragments for <i>C. difficile</i> TcdB positive control                         | TACACCCCTGCGGCAACGTTGAAGCTCCTGGATTACACTGGCTGGATC<br>TAAGCCGTGACACCCGTCATACTCCATAACCGTCTGTAACTCACGGCTT<br>GTTCTGGACTGGATTGCCATTCTCTCAGAGTATTATGCAGGCCGGCGTA<br>CGGGTCCCATATAAACCTGTCATAGCTTACCTGACTCTACTTGGAAATG<br>TGGCTTACAAACAGGTGTATTTAGTACAGAAGATGGATTTAAATATTTG<br>CCCCAGCTAATACACTTGATGAAAACCTAGAAGGAGAAGCAATTGATTT<br>TACTGGAAAATTAATTATTGACGAAAATATTTATTATTTTGTGATAATTA<br>TAGAGGAGCTGTAGAATGGAAAGAATTAGATGGTGAAATGCACTATTTT<br>AGCCCAGAAAACAGGTAAGCTTTTAAAGGTCTAAATCAAATAGGTG |

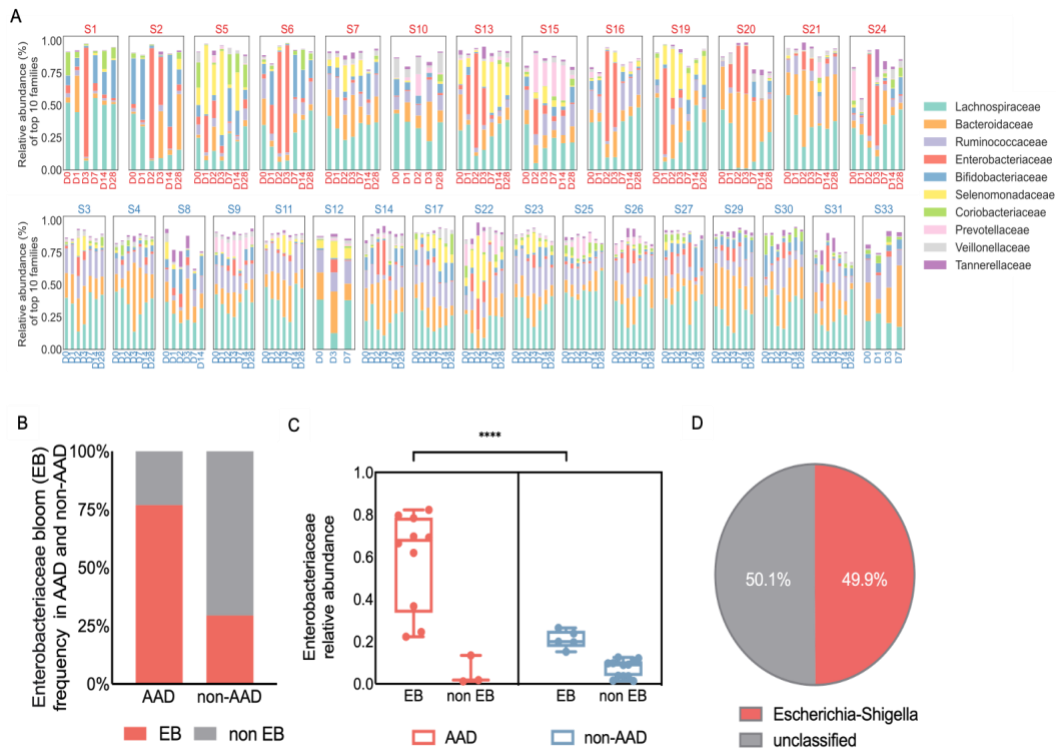

**Figure S1. Enterobacteriaceae bloom (EB) were more common in the AAD group with a much higher magnitude.**

Related to Figure 2. (A) A panel list of the 10 most abundant families in individuals in the AAD (top panel) and non-AAD groups (bottom panel). (B) Enterobacteriaceae blooms (EB) were observed more frequently in the AAD group compared to the non-AAD group (76.9% vs 29.4%). As the increase in Enterobacteriaceae varies between days 1-3 across different individuals, we defined Enterobacteriaceae blooms as having the maximum of Enterobacteriaceae abundance across days 1-3 in each individual being larger than the median(max(days 1-3)-baseline). (C) For all the individuals who experienced EB, the relative abundance of Enterobacteriaceae is higher in the individuals with AAD compared to the individuals with non-AAD (mean 0.59 vs 0.21, FDR corrected  $p < 0.0001$ ). (D) Pie charts of the most abundant genera in Enterobacteriaceae across days 1-3. Within the Enterobacteriaceae family, we observed a higher abundance of Escherichia-Shigella (49.9%) at the genus level.

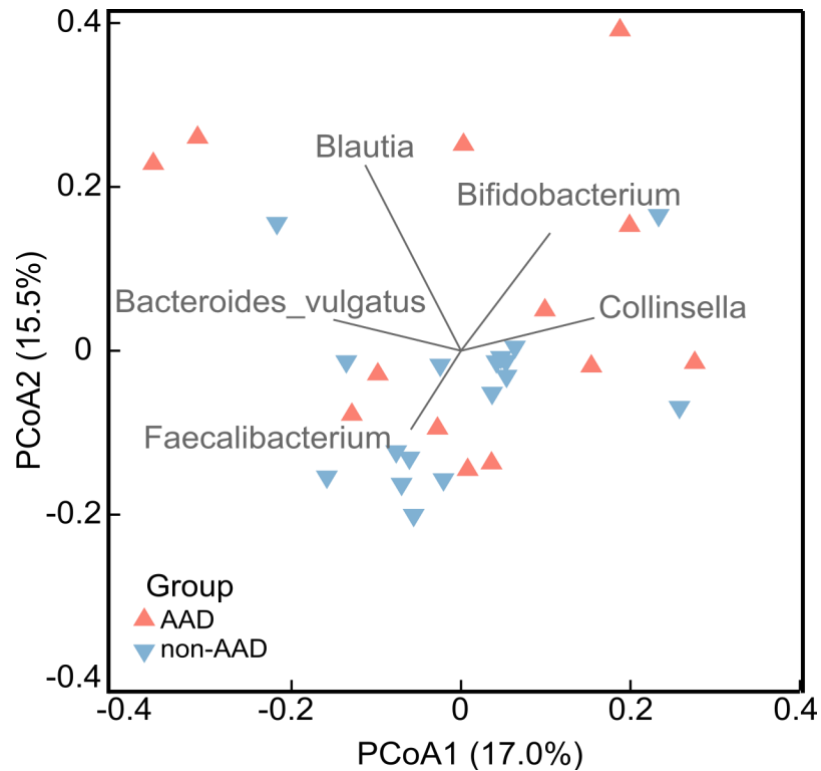

**Figure S2. PCoA of baseline samples based on the ASV level bray-curtis dissimilarity.** Related to Figure 3. Display is based on sample scores on the primary axis (PCoA1, 17.0% variance explained) and secondary axis (PCoA2, 15.5% variance explained). Vector loading plots at the ASV level indicate that ASV assigned to *Faecalibacterium* points to the non-AAD group while many ununified features (e.g., ASVs assigned to *Blautia*, *Bifidobacterium*, *Collinsella*, *Bacteroides vulgatus*) point to the AAD groups (multiple linear correlation with the threshold setting as 0.3).
